# Supplementary material
Source: publisher site journal article supplement (https://study.sagepub.com/sites/default/files/phillips_kelly_2e_appendix_2d.doc)
Supplement: Supplementary file 1 [file phillips_kelly_2e_appendix_2d.doc]

Appendix 2(d) Assessment of Auditory Sequential Memory

**Name: Date of assessment:**

**Date of birth: Chronological age:**

**Auditory sequential memory (short term)**

**For primary age children:**

**Instructions:**

1. When carrying out this assessment items should be delivered at an even pace of about one item per second (which gives time to repeat a word/item **silently** before saying the next). Say, ‘I am going to tell you some things that are in my shopping bag. I want you to say back to me exactly what I have said to you.’

**Practice item:**

Say, ‘sausages’. Pupil responds, ‘sausages’.

Say, ‘Now try two things: tea, jam. Say them back to me in the same order.

If correct proceed: (Note - you can choose your own items.)

ALWAYS WRITE DOWN EXACTLY WHAT THE LEARNER SAYS.

| Series | Response (forwards) |
| --- | --- |
| 1. apples, eggs  2. chicken, butter |  |
| 1. meat, sugar, cola  2. cake, spaghetti, milk |  |
| 1. beans, cheese, fish, pizza  2. oranges, chocolate, bread, peas |  |
| 1. grapes, flour, nuts, sugar, jam  2. eggs, crisps, peas, pears, jelly |  |

1. Explain that you are going to do the same thing using numbers this time. Give an example to practise: 7 - 2. Discontinue when a learner has difficulties.

| Series | Response (forwards) |
| --- | --- |
| 3 - 7  4 - 8 |  |
| 7 - 3 - 1 4 - 8 - 6 |  |
| 5 - 2 - 6 - 1 1 - 4 - 9 - 2 |  |
| 2 - 6 - 1 - 5 7 - 9 - 3 - 1 |  |
| 4 - 9 - 2 - 3 - 6 6 - 4 - 3 - 6 - 8 |  |

In the case of older learners only give the second test (digit span). Increase the number of digits to give two sets of six numbers and two sets of seven.

**Photocopiable**

*Assessment of Learners with Dyslexic-Type Difficulties* 2e © 2018 Sylvia Phillips and Kathleen Kelly (Sage: London).

**Auditory sequential memory** (working memory)

**Reverse order**

For primary children give both: use second example for older learners.

**Instructions:**

1. Say, ‘I am going to tell you again some things that are in my shopping bag. I want you to say back to me what I have said, **but this time** can you say them backwards?’ ‘So if I say, “chops, chocolate”, you will say, “chocolate, chops”.

**Practice item:**

Try this one: sausages, cheese.

If the learner responds correctly, proceed with examples below. (If not, give another example.)

| Series | Response (backwards) |
| --- | --- |
| 1. chicken, carrots  2. eggs, fish |  |
| 1. sugar, gravy, rice  2. cake, spaghetti, meat |  |
| 1. yogurt, cheese, tomatoes, peas  2. pizza, honey, cornflakes, melon |  |
| 1. strawberries, fish, peas, burgers, carrots  2. chips, cola, salad, milk, oranges |  |

2. Explain that you are going to do the same thing using numbers this time. Give a practice example: 5 - 2. Discontinue when learner has difficulties.

| Series | Response |
| --- | --- |
| 3 - 7 8 - 2 |  |
| 2 - 4 - 9  3 - 7 - 1 |  |
| 5 - 3 - 4 - 2 7 - 3 - 6 - 4 |  |
| 2 - 8 - 9 - 1 - 7 2 - 5 - 3 - 5 - 4 |  |
| 9 - 2 - 7 - 8 - 3 - 5 4 - 9 - 4 - 3 - 1 - 6 |  |
| 3 - 5 - 9 - 8 - 6 - 4 - 7 7 - 1 - 4 - 2 - 9 - 3 - 8 |  |

For older learners, give only the digit span test.

**Photocopiable**

*Assessment of Learners with Dyslexic-Type Difficulties* 2e © 2018 Sylvia Phillips and Kathleen Kelly (Sage: London).
